# Supplementary material for: Switchings of dielectric constant, second harmonic generation and polarization in a polar hybrid cyanometallate crystal
Source: Royal Society of Chemistry journal article supplement (doi:10.1039/c6nj03973a), 2017-01-01
Supplement: c6nj03973a1.pdf [file c6nj03973a1.pdf]

## Supporting Information

**Table S1** Crystal data and structure refinements for **1** at 293 K and 203 K.

**Table S2** Hydrogen bonds of **1** at 293 K (HTP) and 203 K (LTP).

**Figure S1**  $^1\text{H}$  NMR ( $\text{D}_2\text{O}$ ) spectrum of **1**.

**Figure S2**  $^{13}\text{C}$  NMR ( $\text{D}_2\text{O}$ ) spectrum of **1**.

**Figure S3** Infrared spectra of **1** measured at room temperature.

**Figure S4** PXRD pattern for the as-prepared sample of **1** and the simulated one based on the single crystal structure at 293 K.

**Figure S5** TGA measurement of **1** in the temperature range of 315–870 K.

**Figure S6** Crystal morphology and orientation of **1** based on the structure at 293 K.

**Figure S7** Pyroelectric current of **1** measured in a cooling-heating run.

**Figure S8** Basic structure unit of **1** in the LTP with hydrogen bonding interactions.

**Figure S9** Variable temperature PXRD patterns of **1** upon cooling in the temperature range of 298–183 K.

**Figure S10** Arrangement of the dipole moments in the cell unit of **1** in the (a) LTP and (b) HTP.

**Figure S11** The measured non-hysteresis loop in the HTP and LTP along the polar axis.

**Table S1** Crystal data and structure refinements for **1** at 293 K and 203 K.

| T/K                                                                             | 293                                                             | 203                                                             |
|---------------------------------------------------------------------------------|-----------------------------------------------------------------|-----------------------------------------------------------------|
| formula                                                                         | C <sub>12</sub> H <sub>11</sub> CoN <sub>8</sub> S <sub>2</sub> | C <sub>12</sub> H <sub>11</sub> CoN <sub>8</sub> S <sub>2</sub> |
| <i>M<sub>w</sub></i>                                                            | 406.34                                                          | 406.34                                                          |
| crystal system                                                                  | orthorhombic                                                    | orthorhombic                                                    |
| space group                                                                     | <i>Pna</i> 2 <sub>1</sub> (No. 29)                              | <i>Pca</i> 2 <sub>1</sub> (No. 33)                              |
| <i>a</i> / Å                                                                    | 15.03(1)                                                        | 15.71(6)                                                        |
| <i>b</i> / Å                                                                    | 8.92(1)                                                         | 8.70(3)                                                         |
| <i>c</i> / Å                                                                    | 13.21(1)                                                        | 13.25(4)                                                        |
| $\alpha$ / °                                                                    | 90                                                              | 90                                                              |
| $\beta$ / °                                                                     | 90                                                              | 90                                                              |
| $\gamma$ / °                                                                    | 90                                                              | 90                                                              |
| <i>V</i> / Å <sup>3</sup>                                                       | 1771(3)                                                         | 1811(11)                                                        |
| <i>Z</i>                                                                        | 4                                                               | 4                                                               |
| $\rho_{\text{calcd}}$ / g cm <sup>-3</sup>                                      | 1.524                                                           | 1.490                                                           |
| $\mu$ / mm <sup>-1</sup>                                                        | 1.221                                                           | 1.195                                                           |
| Refls. collected /unique                                                        | 12203 / 4032                                                    | 12170 / 4109                                                    |
| <i>R</i> 1 <sup>a</sup> , <i>wR</i> 2 <sup>b</sup> ( <i>I</i> > 2σ( <i>I</i> )) | 0.0955, 0.2817                                                  | 0.1198, 0.3049                                                  |
| GOF                                                                             | 1.153                                                           | 1.095                                                           |
| $\Delta\rho^c$ / e Å <sup>-3</sup>                                              | 1.249, -1.126                                                   | 2.700, -1.121                                                   |

<sup>a</sup>  $R_1 = \Sigma||F_o| - |F_c|| / \Sigma|F_o|$ . <sup>b</sup>  $wR_2 = [\Sigma w(F_o^2 - F_c^2)^2 / \Sigma w(F_o^2)^2]^{1/2}$ . <sup>c</sup> Maximum and minimum residual electron density.

**Table S2** Hydrogen bonds of **1** at 293 K and 203 K.

|      | <i>D</i> -H $\cdots$ <i>A</i> | <i>D</i> -H | H $\cdots$ <i>A</i> | <i>D</i> $\cdots$ <i>A</i> | $\angle$ <i>D</i> -H $\cdots$ <i>A</i> |
|------|-------------------------------|-------------|---------------------|----------------------------|----------------------------------------|
| 293K | N(7)-H(7A) $\cdots$ N(3)#1    | 0.86        | 2.43                | 3.22(5)                    | 152.9                                  |
|      | N(7')-H(7A') $\cdots$ N(3)#1  | 0.86        | 2.39                | 3.20(3)                    | 156.8                                  |
|      | N(8)-H(8A) $\cdots$ N(5)#2    | 0.86        | 2.59                | 3.35(4)                    | 146.7                                  |
|      | N(8')-H(8A') $\cdots$ N(3)#3  | 0.86        | 2.45                | 3.14(2)                    | 137.6                                  |
|      | O(1)-H(1A) $\cdots$ N(4)#2    | 0.85        | 1.77                | 2.62(1)                    | 176.5                                  |
|      | O(1)-H(1B) $\cdots$ N(6)      | 0.85        | 1.77                | 2.62(1)                    | 173.4                                  |
|      | O(1)-H(1C) $\cdots$ N(2)#3    | 0.85        | 1.75                | 2.59(1)                    | 172.2                                  |
| 203K | N(7)-H(7B) $\cdots$ N(4)#4    | 0.86        | 2.16                | 3.01(2)                    | 166.5                                  |
|      | N(8)-H(8B) $\cdots$ N(5)#5    | 0.86        | 1.98                | 2.83(2)                    | 173.5                                  |
|      | O(1)-H(1A) $\cdots$ N(6)#6    | 0.85        | 1.81                | 2.66(2)                    | 176.4                                  |
|      | O(1)-H(1B) $\cdots$ N(1)      | 0.85        | 1.79                | 2.63(2)                    | 176.0                                  |
|      | O(1)-H(1C) $\cdots$ N(2)#7    | 0.85        | 1.79                | 2.63(2)                    | 171.8                                  |

Symmetry codes: #1 -x+1, -y, z-1/2; #2 x, y+1, z; #3 x+1/2, -y+1/2, z; #4 -x, -y+2, z-1/2; #5 -x+1/2, y, z-1/2; #6 x+1/2, -y+1, z; #7 x+1/2, -y+2, z.

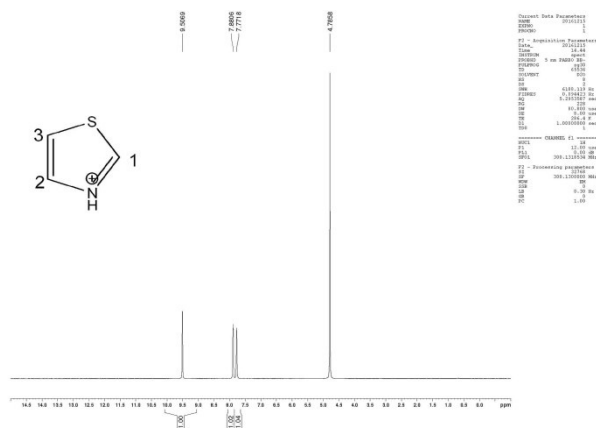

Figure S1  $^1\text{H}$  NMR ( $\text{D}_2\text{O}$ ) spectrum of **1**.

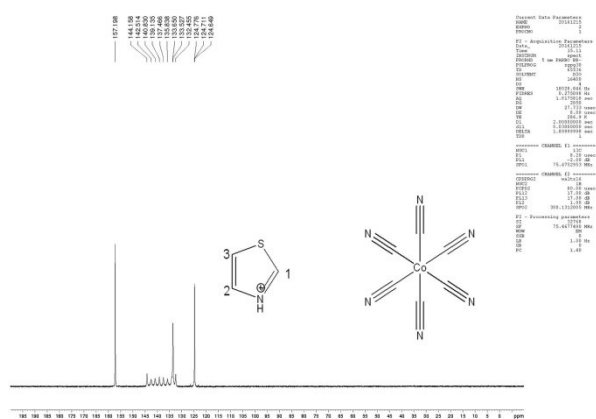

Figure S2  $^{13}\text{C}$  NMR ( $\text{D}_2\text{O}$ ) spectrum of **1**.

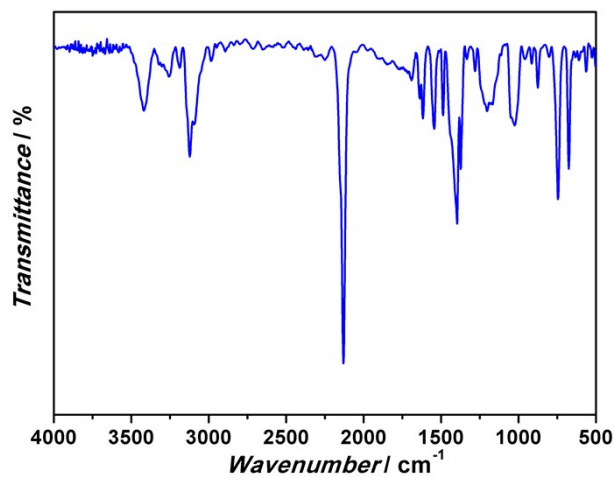

Figure S3 Infrared (IR) spectra of **1** measured at room temperature.

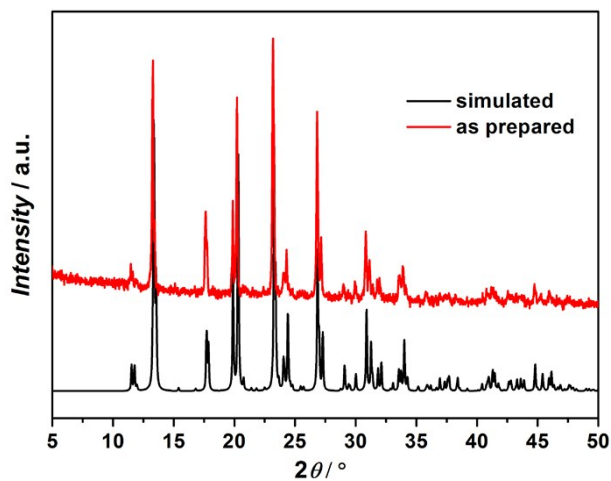

**Figure S4** PXRD pattern for the as-prepared samples of **1** and the simulated one based on the single crystal structure at 293 K.

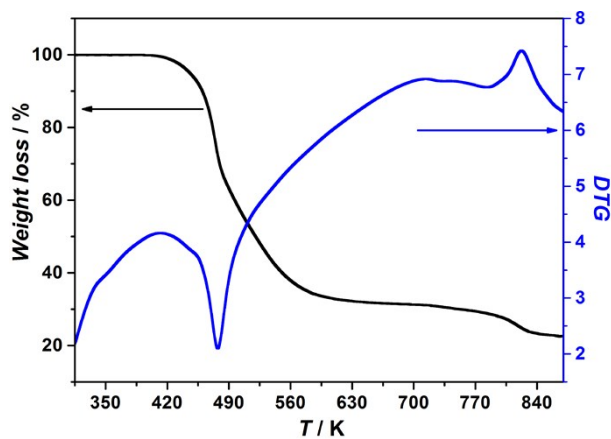

**Figure S5** TGA measurement of **1** in the temperature range of 315–870 K.

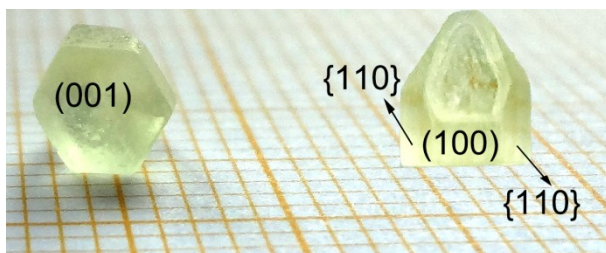

**Figure S6** Crystal morphology and orientation of **1** based on the structure at 293 K.

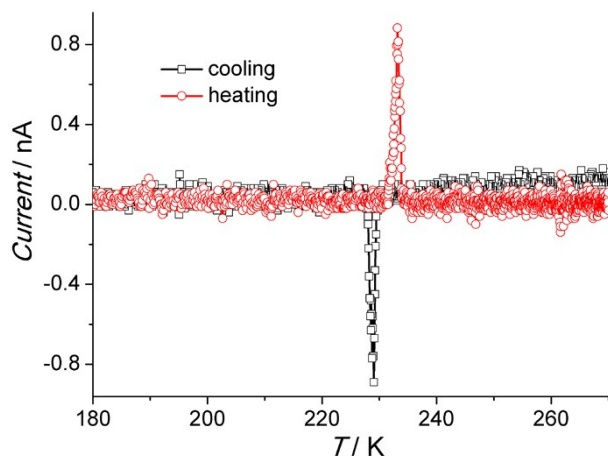

**Figure S7** Pyroelectric current of **1** measured in a cooling-heating run.

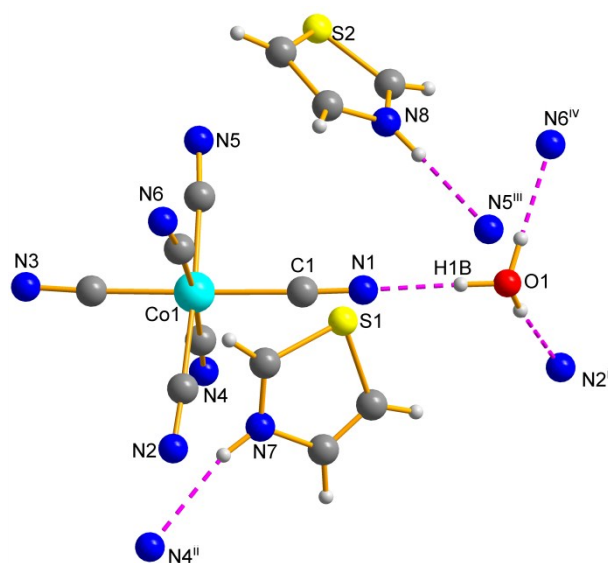

**Figure S8** Basic structure unit of **1** in the LTP with hydrogen bonding interactions. Symmetry codes: i  $0.5+x, 2-y, z$ ; ii  $-x, 2-y, -0.5+z$ ; iii  $0.5-x, y, -0.5+z$ ; iv  $0.5+x, 1-y, z$ .

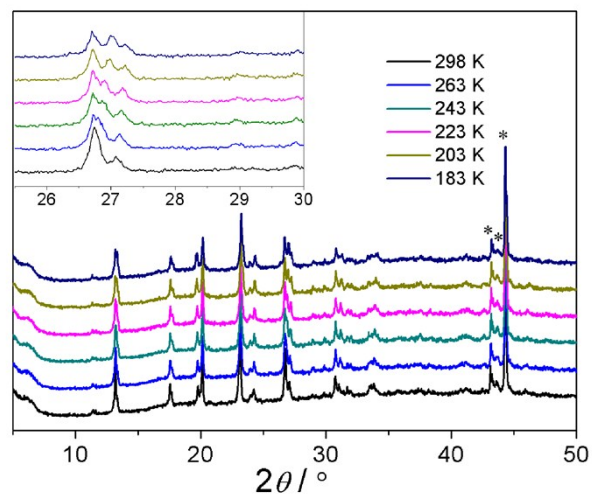

**Figure S9** Variable temperature PXRD patterns of **1** upon cooling in the temperature range of 298–183 K. The asterisked peaks arise from the sample holder.

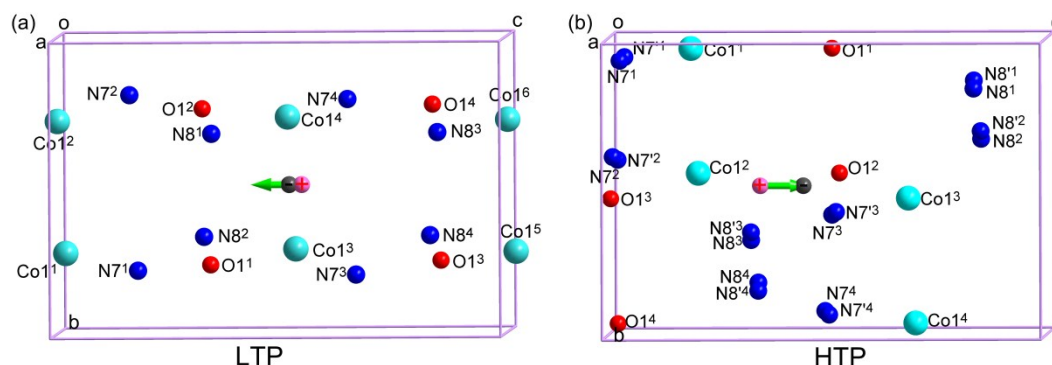

**Figure S10** Arrangements of the dipole moments in the cell unit of **1** in the (a) 203 K (LTP) and (b) 293 K (HTP). The inserted atoms with pink and black colors present the centers of the positive charge and negative charge, respectively. The arrows in green denote the dipole moments of **1**.

According to the crystal structure data collected at 203 K and 293 K, we select a unit cell and make an assumption that the positive charge of  $(C_3H_4NS)^+$  and  $(H_3O)^+$  and the negative charge of  $[Co(CN)_6]^{3-}$  is on the N atom, O atom and Co atom, respectively.

### 1. 203 K

| Atoms | Coordinate                                |                                           | Center coordinate |
|-------|-------------------------------------------|-------------------------------------------|-------------------|
| Co    | Co1 <sup>1</sup> (0.4109, 0.7323, 0.0152) | Co1 <sup>4</sup> (0.5891, 0.2677, 0.5152) | (0.5,0.5,0.51524) |
|       | Co1 <sup>2</sup> (0.9109, 0.2677, 0.0947) | Co1 <sup>5</sup> (0.4109, 0.7323, 1.0152) |                   |
|       | Co1 <sup>3</sup> (0.0891, 0.7323, 0.5152) | Co1 <sup>6</sup> (0.9109, 0.2677, 1.0152) |                   |
|       |                                           |                                           |                   |
| N     | N7 <sup>1</sup> (0.0182, 0.8060, 0.1620)  | N7 <sup>2</sup> (0.5182, 0.1940, 0.1620)  | (0.5,0.5,0.5429)  |
|       | N7 <sup>3</sup> (0.4818, 0.8060, 0.6620)  | N7 <sup>4</sup> (0.9818, 0.1940, 0.6620)  |                   |
|       | N8 <sup>1</sup> (0.2783, 0.3348, 0.3352)  | N8 <sup>2</sup> (0.7783, 0.6652, 0.3352)  |                   |
|       | N8 <sup>3</sup> (0.2217, 0.3348, 0.8352)  | N8 <sup>4</sup> (0.7217, 0.6652, 0.8352)  |                   |
| O     | O1 <sup>1</sup> (0.4162, 0.7730, 0.3372)  | O1 <sup>2</sup> (0.9162, 0.2270, 0.3372)  |                   |
|       | O1 <sup>3</sup> (0.0838, 0.7730, 0.8372)  | O1 <sup>4</sup> (0.5838, 0.2270, 0.8372)  |                   |

$$P = \lim_{V \rightarrow \infty} \frac{1}{V} \sum q_i r_i$$

$$= (q_- r_- + q_+ r_+) / V$$

$$\begin{aligned}
&= [(-3e \times 0.51524) \times 4 + (3e \times 0.5429) \times 4] \times c/V \\
&= [0.33192 \times (-1.6 \times 10^{-19}) \times 13.25 \times 10^{-10} \text{ C m}] / (1811 \times 10^{-30} \text{ m}^3) \\
&= -0.0389 \times 10^{-2} \text{ C m}^{-2} \\
&= -0.0389 \mu\text{C cm}^{-2}
\end{aligned}$$

2. 293 K

| Atoms | Coordinate                                 |                                           | Center coordinate |
|-------|--------------------------------------------|-------------------------------------------|-------------------|
| Co    | Co1 <sup>1</sup> (0.6685, 0.02898, 0.1934) | Co1 <sup>3</sup> (0.8315, 0.5290, 0.6934) | (0.5,0.5,0.4434)  |
|       | Co1 <sup>2</sup> (0.1685, 0.4710, 0.1934)  | Co1 <sup>4</sup> (0.3315, 0.9710, 0.6934) |                   |
| N     | N7 <sup>1</sup> (-0.0004, 0.098, 0.009)    | N7 <sup>1</sup> (-0.0433, 0.087, 0.019)   | (0.5,0.5,0.3451)  |
|       | N7 <sup>2</sup> (0.496, 0.402, 0.009)      | N7 <sup>2</sup> (0.4567, 0.413, 0.019)    |                   |
|       | N7 <sup>3</sup> (0.504, 0.598, 0.509)      | N7 <sup>3</sup> (0.5433, 0.587, 0.519)    |                   |
|       | N7 <sup>4</sup> (1.004, 0.902, 0.509)      | N7 <sup>4</sup> (1.0433, 0.913, 0.519)    |                   |
|       | N8 <sup>1</sup> (0.634, 0.168, 0.836)      | N8 <sup>1</sup> (0.6128, 0.141, 0.8363)   |                   |
|       | N8 <sup>2</sup> (0.134, 0.332, 0.836)      | N8 <sup>2</sup> (0.1128, 0.359, 0.8363)   |                   |
|       | N8 <sup>3</sup> (0.866, 0.668, 0.336)      | N8 <sup>3</sup> (0.8872, 0.641, 0.3363)   |                   |
|       | N8 <sup>4</sup> (0.366, 0.832, 0.336)      | N8 <sup>4</sup> (0.3872, 0.859, 0.3363)   |                   |
| O     | O1 <sup>1</sup> (0.6675, 0.0290, 0.5151)   | O1 <sup>2</sup> (0.1675, 0.4710, 0.5151)  |                   |
|       | O1 <sup>3</sup> (0.8325, 0.5290, 0.0151)   | O1 <sup>4</sup> (0.3325, 0.9710, 0.0151)  |                   |

$$P = \lim_{V \rightarrow 1} \sum q_i r_i$$

$$= (q_{-r} + q_{+r}) / V$$

$$= [(-3e \times 0.4434) \times 4 + (3e \times 0.3451) \times 4] \times c/V$$

$$= [-1.1796 \times (-1.6 \times 10^{-19}) \times 13.21 \times 10^{-10} \text{ C m}] / (1771 \times 10^{-30} \text{ m}^3)$$

$$= 0.1408 \times 10^{-2} \text{ C m}^{-2}$$

$$= 0.1408 \mu\text{C cm}^{-2}$$

$$|\Delta P| = |P_{203\text{K}} - P_{293\text{K}}|$$

$$= |-0.0389 \mu\text{C cm}^{-2} - 0.1408 \mu\text{C cm}^{-2}|$$

$$= 0.1797 \mu\text{C cm}^{-2}$$
